# Supplementary material for: A coarse grained molecular dynamics simulation study on the structural properties of carbon nanotube–dendrimer composites
Source: Royal Society of Chemistry journal article supplement (doi:10.1039/c8sm00253c), 2018-01-01
Supplement: c8sm00253c1.pdf [file c8sm00253c1.pdf]

## Supplementary Information

### A Coarse Grained Molecular Dynamics Simulation Study on the Structural Properties of Carbonnanotube-Dendrimer

Sajjad Kavyani<sup>a</sup>, Mitra Dadvar<sup>a</sup>, Hamid Modarress<sup>a†</sup>, Sepideh Amjad-Iranagh<sup>a</sup>

<sup>a</sup> Department of Chemical Engineering, Amirkabir University of Technology

\* Corresponding Author

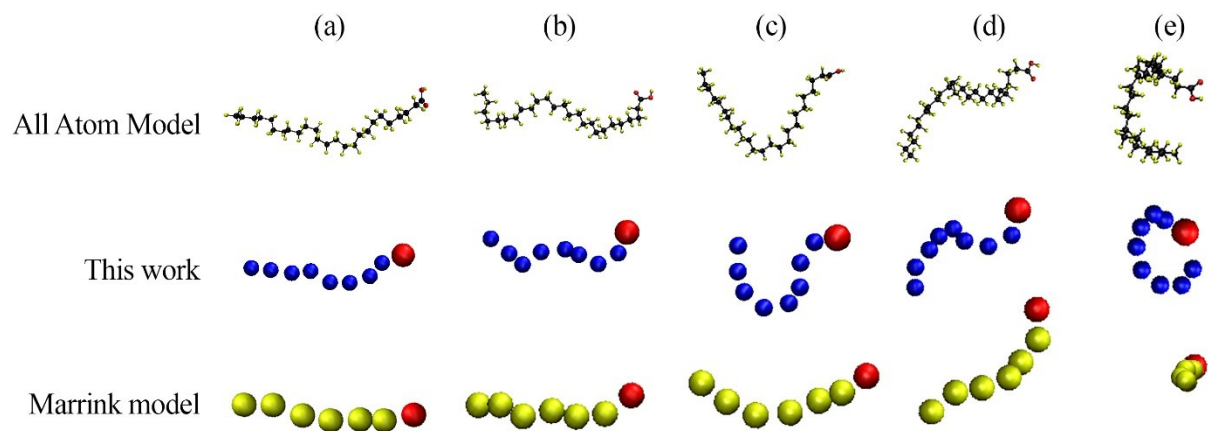

Figure S1. Randomly chosen structural conformations of FTA molecule ( $C_{25}H_{50}O_2$ ) in the course of simulations including: all atom, this work and Marrink model. (a to d) Folding and (e) Torsion.

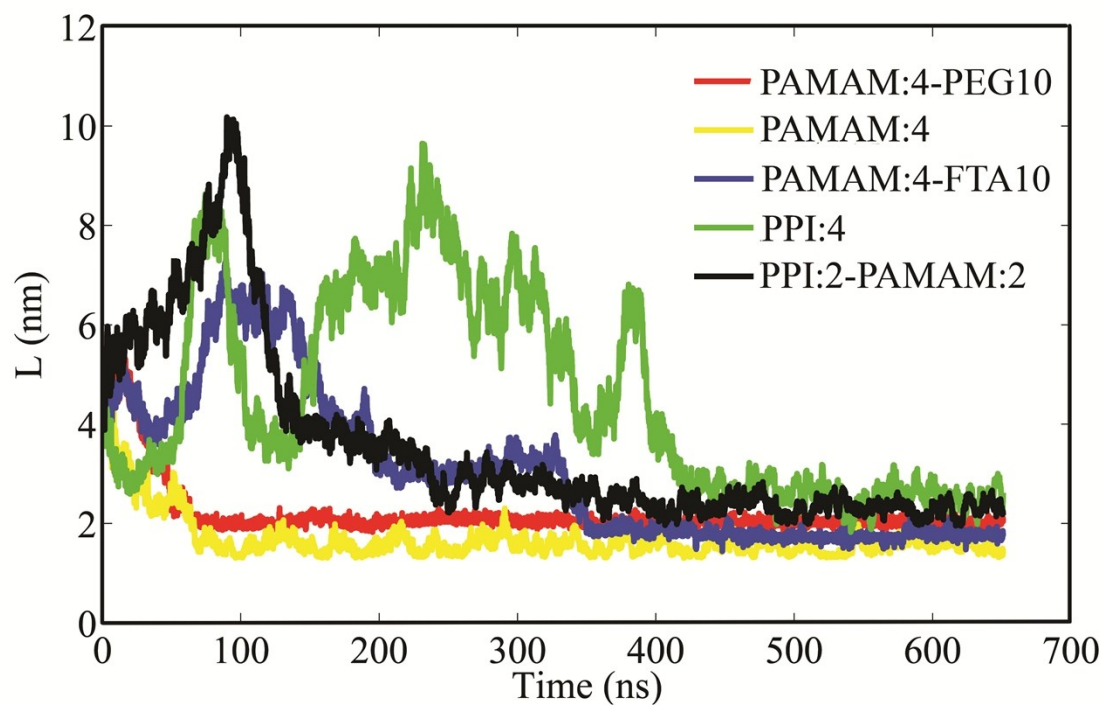

Figure S2. Distance ( $L$ ) between centre of mass (COM) of dendrimer complexes and CNT versus time for some randomly selected CNT-dendrimer complexes
